# Supplementary material for: An Environmental and Nutritional Evaluation of School Food Menus in Bahia, Brazil That Contribute to Local Public Policy to Promote Sustainability
Source: MDPI journal article supplement (doi:10.3390/nu14071519), 2022-04-06
Supplement: s1 [file s1]

**Table S1:** Nutritional targets for the menus according to the age group.

| Nutrient         | Age groups       |               |               |                |                 |                 |                 |                 |
|------------------|------------------|---------------|---------------|----------------|-----------------|-----------------|-----------------|-----------------|
|                  | 7 - 11<br>months | 1 - 3<br>year | 4 - 5<br>year | 6 - 10<br>year | 11 - 15<br>year | 16 - 18<br>year | 19 - 30<br>year | 31 - 60<br>year |
| Energy, kcal     | 450              | 700           | 950           | 450            | 650             | 750             | 680             | 650             |
| Carbohydrates, g | 73.1             | 114.9         | 154.4         | 73.1           | 105.6           | 121.8           | 110.5           | 105.6           |
| Protein, g       | 14.0             | 21.9          | 29.7          | 14             | 20.3            | 23.4            | 21.3            | 20.3            |
| Total fat, g     | 11.3             | 17.5          | 23.8          | 11.3           | 16.3            | 18.8            | 17              | 16.3            |
| Saturated fat, g | 5.0              | 7.8           | 10.6          | 5.0            | 7.2             | 8.3             | 7.6             | 7.2             |
| Cholesterol, mg  | 210              | 210           | 210           | 90             | 90              | 90              | 90              | 90              |
| Fiber, mg        |                  | 13.3          | 17.5          | 8.0            | 9.0             | 9.6             | 9.5             | 8.5             |
| Added sugar, g   | 0                | 0             | 23.8          | 11.3           | 16.3            | 18.8            | 17              | 16.3            |
| Sodium, mg       | 1400             | 1400          | 1400          | 600            | 600             | 600             | 600             | 600             |
| Calcium, mg      | 189              | 350           | 560           | 315            | 390             | 390             | 300             | 330             |
| Iron, mg         | 7.7              | 4.9           | 7.0           | 2.7            | 3.2             | 3.9             | 3.9             | 3.2             |
| Magnesium, mg    | 54               | 56            | 91            | 56             | 95              | 116             | 107             | 111             |
| Zinc, mg         | 2.1              | 2.1           | 3.5           | 2.0            | 2.7             | 3               | 2.9             | 2.9             |
| Vitamin A, mcg   | 350              | 210           | 280           | 150            | 210             | 240             | 240             | 240             |
| Vitamin C, mg    | 35               | 12            | 19            | 11             | 18              | 21              | 26              | 26              |
| Vitamin B12, mcg | 0.35             | 0.63          | 0.84          | 0.54           | 0.54            | 0.72            | 0.72            | 0.72            |

**Table S2:** Total GHGE per year in Kg of CO<sub>2</sub>e of school food menus according to the age group and percentage of menus being sustainable. Total number of students served in 200 scholar days was 32,000.

| Year    | Group 1      |             | Group 2      |             | % of menus<br>being<br>sustainable |
|---------|--------------|-------------|--------------|-------------|------------------------------------|
|         | Conventional | Sustainable | Conventional | Sustainable |                                    |
| 2018    | 400.44       | 0           | 241.95       | 0           | 0%                                 |
| 2019/01 | 160.18       | 20.00       | 96.78        | 10.56       | 20%                                |
| 2019/02 | 120.13       | 40.00       | 72.59        | 21.12       | 40%                                |
| 2020/01 | 80.09        | 60.00       | 48.39        | 31.68       | 60%                                |
| 2020/02 | 40.04        | 80.00       | 24.20        | 42.24       | 80%                                |
| 2021    | 80.09        | 160.00      | 48.39        | 84.48       | 80%                                |

**Table S3:** List of ingredients and *per capita* amount of conventional and sustainable school food menus.

| Conventional Food Menu |                             |                       |             |                   | Conventional Food Menu |                                     |                     |             |                   |
|------------------------|-----------------------------|-----------------------|-------------|-------------------|------------------------|-------------------------------------|---------------------|-------------|-------------------|
| Recipe number          | Food recipe                 | Ingredients           | Unit (g/ml) | Per capita (g/ml) | Recipe number          | Food recipe                         | Ingredients         | Unit (g/ml) | Per capita (g/ml) |
| 1                      | Latte                       | Coffee                | g           | 5                 | 23                     | Beans                               | Pinto Beans         | g           | 20                |
|                        |                             | Milk Powder           | g           | 20                |                        |                                     | Garlic              | g           | 1                 |
|                        |                             | Tap Water             | ml          | 200               |                        |                                     | Soybean Oil         | ml          | 4                 |
|                        |                             | Sugar                 | g           | 15                |                        |                                     | Tap Water           | ml          | 60                |
| 2                      | Banana                      | Banana                | g           | 75                | 24                     | Muleteer Beans with Beef Jerky      | Salt                | g           | 1                 |
| 3                      | Mango                       | Mango                 | g           | 30                |                        |                                     | Onion               | g           | 8                 |
| 4                      | Papaya                      | Papaya                | g           | 30                |                        |                                     | Black Eyed Beans    | g           | 20                |
| 5                      | Watermelon                  | Watermelon            | g           | 100               |                        |                                     | Garlic              | g           | 1                 |
| 6                      | Apple                       | Apple                 | g           | 50                |                        |                                     | Soybean Oil         | ml          | 4                 |
| 7                      | Guava                       | Guava                 | g           | 50                |                        |                                     | Onion               | g           | 8                 |
| 8                      | Mango Juice                 | Tap Water             | ml          | 200               |                        |                                     | Tomato              | g           | 10                |
|                        |                             | Mango                 | g           | 50                |                        |                                     | Bell Pepper         | g           | 3                 |
|                        |                             | Sugar                 | g           | 15                |                        |                                     | Coriander           | g           | 1.5               |
|                        |                             | Tap Water             | ml          | 200               |                        |                                     | Parsley             | g           | 1                 |
| 9                      | Acerola Juice               | Acerola               | g           | 50                |                        |                                     | Bay Leaves          | g           | 1                 |
|                        |                             | Sugar                 | g           | 15                |                        |                                     | Salt                | g           | 1                 |
| 10                     | Guava Juice                 | Tap Water             | ml          | 200               |                        |                                     | Chives              | g           | 1                 |
|                        |                             | Guava                 | g           | 50                |                        |                                     | Tap Water           | ml          | 60                |
|                        |                             | Sugar                 | g           | 15                |                        |                                     | Jerky               | g           | 20                |
|                        |                             | Banana                | g           | 50                | 25                     | Pasta with Sardine and Tomato Sauce | Cassava Flour       | g           | 15                |
| 12                     | Banana and Apple Smoothie   | Apple                 | g           | 50                |                        |                                     | Spaghetti Pasta     | g           | 30                |
|                        |                             | Peanut Milk           | ml          | 30                |                        |                                     | Canned Sardines     | g           | 20                |
|                        |                             | Tap Water             | ml          | 120               |                        |                                     | Soybean Oil         | ml          | 4                 |
|                        |                             | Sugar                 | g           | 20                |                        |                                     | Garlic              | g           | 1                 |
| 12                     | Porridge                    | Milk Powder           | g           | 20                |                        |                                     | Onion               | g           | 8                 |
|                        |                             | Tap Water             | ml          | 200               |                        |                                     | Bell Pepper         | g           | 3                 |
|                        |                             | Multigrain Oat Cereal | g           | 20                |                        |                                     | Parsley             | g           | 1                 |
|                        |                             | Flaked Cornflour      | g           | 20                |                        |                                     | Oregano             | g           | 1                 |
| 13                     | Sweetcorn Pudding           | Milk Powder           | g           | 20                |                        |                                     | Salt                | g           | 1                 |
|                        |                             | Sugar                 | g           | 15                |                        |                                     | Chives              | g           | 1                 |
|                        |                             | Coconut Milk          | ml          | 3                 |                        |                                     | Coriander           | g           | 1.5               |
|                        |                             | Tap water             | ml          | 200               |                        |                                     | Tap Water           | ml          | 300               |
| 14                     | Sweet Rice Pudding          | White Rice            | g           | 30                |                        |                                     | Tomato              | g           | 10                |
|                        |                             | Milk Powder           | g           | 20                | 26                     | Pasta with Tomato Sauce             | Canned Tomato Sauce | g           | 10                |
|                        |                             | Coconut Milk          | ml          | 3                 |                        |                                     | Spaghetti pasta     | g           | 30                |
|                        |                             | Fresh Coconut         | g           | 20                |                        |                                     | Soybean Oil         | ml          | 4                 |
| 15                     | Cornmeal Couscous           | Sugar                 | g           | 15                |                        |                                     | Garlic              | g           | 1                 |
|                        |                             | Clove                 | g           | 1                 |                        |                                     | Onion               | g           | 8                 |
|                        |                             | Tap Water             | ml          | 200               |                        |                                     | Tomato              | g           | 10                |
|                        |                             | Flaked Cornflour      | g           | 30                |                        |                                     | Bell Pepper         | g           | 3                 |
| 16                     | Tapioca Crepe               | Salt                  | g           | 1                 |                        |                                     | Parsley             | g           | 1                 |
|                        |                             | Wheat Flour           | g           | 50                |                        |                                     | Chives              | g           | 1                 |
|                        |                             | Sugar                 | g           | 15                |                        |                                     | Tap water           | ml          | 300               |
|                        |                             | Baking Powder         | g           | 30                |                        |                                     | Oregano             | g           | 1                 |
| 17                     | Brazilian Style Carrot Cake | Carrot                | g           | 10                | 27                     | Beef Bolognese Pasta                | Salt                | g           | 1                 |
|                        |                             | Soybean Oil           | ml          | 4                 |                        |                                     | Canned Tomato Sauce | g           | 10                |
|                        |                             | Bread                 | g           | 50                |                        |                                     | Pasta               | g           | 30                |
|                        |                             | Wheat Flour           | g           | 50                |                        |                                     | Soybean Oil         | ml          | 4                 |
| 18                     | Coconut Cookies             | Fresh Coconut         | g           | 20                |                        |                                     | Garlic              | g           | 1                 |
|                        |                             | Sugar                 | g           | 15                |                        |                                     | Onion               | g           | 8                 |
|                        |                             | Butter                | g           | 30                |                        |                                     | Canned Tomato Sauce | g           | 10                |
|                        |                             | Cracker               | g           | 40                |                        |                                     | Tomato              | g           | 10                |
| 20                     | Cream Cracker               | Onion                 | g           | 8                 |                        |                                     | Bell Pepper         | g           | 3                 |
|                        |                             | Garlic                | g           | 1                 |                        |                                     | Parsley             | g           | 1                 |
|                        |                             | Soybean Oil           | ml          | 4                 |                        |                                     | Chives              | g           | 1                 |
|                        |                             | Salt                  | g           | 1                 |                        |                                     | Coriander           | g           | 1.5               |
| 22                     | Rice                        | Tap Water             | ml          | 60                |                        |                                     | Tap Water           | ml          | 300               |
|                        |                             | Parboiled Rice        | g           | 30                |                        |                                     | Oregano             | g           | 1                 |
|                        |                             |                       |             |                   |                        |                                     | Salt                | g           | 1                 |
|                        |                             |                       |             |                   |                        |                                     | Minced Beef         | g           | 30                |

| Conventional Food Menu |                                  |                     |             |                   | Conventional Food Menu |                            |                  |             |                   |
|------------------------|----------------------------------|---------------------|-------------|-------------------|------------------------|----------------------------|------------------|-------------|-------------------|
| Recipe number          | Food recipe                      | Ingredients         | Unit (g/ml) | Per capita (g/ml) | Recipe number          | Food recipe                | Ingredients      | Unit (g/ml) | Per capita (g/ml) |
| 28                     | Beef Stew with Potato and Carrot | Diced beef          | g           | 30                | 33                     | Mashed Potato              | Potato           | g           | 25                |
|                        |                                  | Onion               | g           | 8                 |                        |                            | Salt             | g           | 1                 |
|                        |                                  | Garlic              | g           | 1                 |                        |                            | Milk Powder      | g           | 20                |
|                        |                                  | Soybean Oil         | ml          | 4                 |                        |                            | Margarine        | g           | 3                 |
|                        |                                  | Potato              | g           | 25                |                        |                            | Soybean Oil      | ml          | 4                 |
|                        |                                  | Carrot              | g           | 10                |                        |                            | Onion            | g           | 8                 |
|                        |                                  | Canned Tomato Sauce | g           | 10                |                        |                            | Garlic           | g           | 1                 |
|                        |                                  | Tomato              | g           | 10                | 34                     | Eggs Omelet                | Tap Water        | ml          | 200               |
|                        |                                  | Bell Pepper         | g           | 3                 |                        |                            | Egg              | g           | 50                |
|                        |                                  | Parsley             | g           | 1                 |                        |                            | Potato           | g           | 25                |
|                        |                                  | Chives              | g           | 1                 |                        |                            | Carrot           | g           | 10                |
|                        |                                  | Oregano             | g           | 1                 |                        |                            | Salt             | g           | 1                 |
|                        |                                  | Salt                | g           | 1                 |                        |                            | Tomato           | g           | 10                |
|                        |                                  | Black Pepper        | g           | 1                 |                        |                            | Wheat Flour      | g           | 50                |
| 29                     | Fish Fillet with Potato          | White Fish Filet    | g           | 80                | 35                     | "Couscous with Josefina"   | Butter           | g           | 3                 |
|                        |                                  | Garlic              | g           | 1                 |                        |                            | Flaked Cornflour | g           | 30                |
|                        |                                  | Onion               | g           | 8                 |                        |                            | Tap Water        | ml          | 200               |
|                        |                                  | Soybean Oil         | g           | 4                 |                        |                            | Salt             | g           | 1                 |
|                        |                                  | Potato              | g           | 25                |                        |                            | Smoked Sausage   | g           | 10                |
|                        |                                  | Cocunut Milk        | ml          | 3                 |                        |                            | Onion            | g           | 8                 |
|                        |                                  | Tomato              | g           | 10                |                        |                            | Soybean Oil      | ml          | 4                 |
|                        |                                  | Bell Pepper         | g           | 3                 |                        |                            | Tomato           | g           | 10                |
|                        |                                  | Parsley             | g           | 1                 |                        |                            | Bell Pepper      | g           | 3                 |
|                        |                                  | Chives              | g           | 1                 |                        |                            | Parsley          | g           | 1                 |
|                        |                                  | Oregano             | g           | 1                 |                        |                            | Chives           | g           | 1                 |
|                        |                                  | Salt                | g           | 1                 | 36                     | Vegetable and Chicken Soup | Chicken          | g           | 50                |
|                        |                                  | Black Pepper        | g           | 1                 |                        |                            | Pasta            | g           | 20                |
| 30                     | Chicken                          | Chicken Thigh       | g           | 80                |                        |                            | Salt             | g           | 1                 |
|                        |                                  | Canned Tomato Sauce | g           | 10                |                        |                            | Pumpkin          | g           | 25                |
|                        |                                  | Garlic              | g           | 1                 |                        |                            | Garlic           | g           | 1                 |
|                        |                                  | Onion               | g           | 8                 |                        |                            | Onion            | g           | 8                 |
|                        |                                  | Soybean Oil         | ml          | 4                 |                        |                            | Carrot           | g           | 10                |
|                        |                                  | Tomato              | g           | 10                |                        |                            | Potato           | g           | 25                |
|                        |                                  | Bell Pepper         | g           | 3                 |                        |                            | Coriander        | g           | 1.5               |
|                        |                                  | Parsley             | g           | 1                 |                        |                            | Tap Water        | ml          | 200               |
|                        |                                  | Chives              | g           | 1                 |                        |                            | Tomato           | g           | 10                |
|                        |                                  | Coriander           | g           | 1.5               |                        |                            | Soybean Oil      | ml          | 4                 |
|                        |                                  | Oregano             | g           | 1                 | 37                     | Sweet Potato               | Sweet Potato     | g           | 25                |
|                        |                                  | Salt                | g           | 1                 | 38                     | Carrot                     | Carrot           | g           | 10                |
|                        |                                  | Black Pepper        | g           | 1                 | 39                     | Bread with Margarine       | Bread            | g           | 50                |
|                        |                                  | Vinager             | g           | 5                 |                        |                            | Margarine        | g           | 3                 |
| 31                     | Diced Chicken Breast             | Lime                | g           | 2                 | 40                     | Sweet Potato with Egg      | Sweet Potato     | g           | 25                |
|                        |                                  | Chicken Breast      | g           | 50                |                        |                            | Salt             | g           | 1                 |
|                        |                                  | Canned Tomato Sauce | g           | 10                |                        |                            | Egg              | g           | 50                |
|                        |                                  | Garlic              | g           | 1                 | 41                     | Braised Kale               | Kale             | g           | 5                 |
|                        |                                  | Onion               | g           | 8                 |                        |                            | Garlic           | g           | 1                 |
|                        |                                  | Soybean Oil         | ml          | 4                 |                        |                            | Soya oil         | ml          | 4                 |
|                        |                                  | Tomato              | g           | 10                | 42                     | Hot Chocolate              | Salt             | g           | 1                 |
|                        |                                  | Bell Pepper         | g           | 3                 |                        |                            | Chocolate Powder | g           | 150               |
|                        |                                  | Parsley             | g           | 1                 |                        |                            | Tap water        | ml          | 250               |
|                        |                                  | Chives              | g           | 1                 | 43                     | Bread with Fried Egg       | Milk Powder      | g           | 20                |
|                        |                                  | Oregano             | g           | 1                 |                        |                            | Bread            | g           | 50                |
|                        |                                  | Salt                | g           | 1                 |                        |                            | Egg (fried)      | g           | 50                |
|                        |                                  | Black Pepper        | g           | 1                 | 44                     | Guava Jam                  | Soybean Oil      | ml          | 4                 |
|                        |                                  | Vinager             | g           | 5                 |                        |                            | Guava            | g           | 28                |
|                        |                                  | Lime                | g           | 2                 |                        |                            | Tap Water        | ml          | 6                 |
| 32                     | Cassava with Pulled Beef         | Cassava             | g           | 60                | 45                     | Yogurt (any flavour)       | Sugar            | g           | 17                |
|                        |                                  | Minced Beef         | g           | 77                |                        |                            | Passion Fruit    | ml          | 14                |
|                        |                                  | Garlic              | g           | 1                 |                        |                            | Lime             | ml          | 0.14              |
|                        |                                  | Onion               | g           | 8                 | 46                     | Crackers with Guava Jam    | Yogurt           | g           | 200               |
|                        |                                  | Soybean Oil         | ml          | 4                 |                        |                            | Guava Jam        | g           | 50                |
|                        |                                  | Tomato              | g           | 10                |                        |                            | Crackers         | g           | 163               |
|                        |                                  | Bell Pepper         | g           | 3                 |                        |                            |                  |             |                   |
|                        |                                  | Parsley             | g           | 1                 |                        |                            |                  |             |                   |
|                        |                                  | Chives              | g           | 1                 |                        |                            |                  |             |                   |
|                        |                                  | Oregano             | g           | 1                 |                        |                            |                  |             |                   |
|                        |                                  | Salt                | g           | 1                 |                        |                            |                  |             |                   |
|                        |                                  | Tap Water           | ml          | 120               |                        |                            |                  |             |                   |
|                        |                                  | Spicy Salt          | g           | 2                 |                        |                            |                  |             |                   |
|                        |                                  | Black Pepper        | g           | 1                 |                        |                            |                  |             |                   |

| Sustainable Food Menu |                            |                     |             |                   | Sustainable Food Menu |                                           |                     |             |                   |
|-----------------------|----------------------------|---------------------|-------------|-------------------|-----------------------|-------------------------------------------|---------------------|-------------|-------------------|
| Recipe number         | Food recipe                | Ingredients         | Unit (g/ml) | Per capita (g/ml) | Recipe number         | Food recipe                               | Ingredients         | Unit (g/ml) | Per capita (g/ml) |
| 1                     | Peanut Milk                | Peanuts             | g           | 30                | 22                    | Beans                                     | Pinto beans         | g           | 20                |
|                       |                            | Tap Water           | ml          | 200               |                       |                                           | Garlic              | g           | 1                 |
| 2                     | Banana                     | Banana              | g           | 75                |                       |                                           | Onion               | g           | 8                 |
| 3                     | Mango                      | Mango               | g           | 30                |                       |                                           | Tap Water           | ml          | 60                |
| 4                     | Papaya                     | Papaya              | g           | 30                |                       |                                           | Salt                | g           | 1                 |
| 5                     | Watermelon                 | Watermelon          | g           | 100               |                       |                                           | Soybean Oil         | ml          | 4                 |
| 6                     | Apple                      | Apple               | g           | 50                |                       |                                           | Onion               | g           | 8                 |
| 7                     | Mango Juice                | Tap Water           | ml          | 200               | 23                    | Vegetable Couscous                        | Flaked Cornflour    | g           | 30                |
|                       |                            | Mango               | g           | 50                |                       |                                           | Carrot              | g           | 20                |
|                       |                            | Sugar               | g           | 15                |                       |                                           | Soya Protein Mince  | g           | 10                |
| 8                     | Acerola Juice              | Tap Water           | ml          | 200               |                       |                                           | Tomato              | g           | 10                |
|                       |                            | Acerola             | g           | 50                |                       |                                           | Bell Pepper         | g           | 3                 |
|                       |                            | Sugar               | g           | 15                |                       |                                           | Onion               | g           | 8                 |
| 9                     | Guava Juice                | Tap Water           | ml          | 200               |                       |                                           | Garlic              | g           | 1                 |
|                       |                            | Guava               | g           | 50                |                       |                                           | Canned Tomato Sauce | g           | 10                |
|                       |                            | Sugar               | g           | 15                |                       |                                           | Soybean Oil         | ml          | 4                 |
| 11                    | Papaya and Apple Smoothie  | Papaya              | g           | 50                |                       |                                           | Tap Water           | ml          | 60                |
|                       |                            | Apple               | g           | 50                |                       |                                           | Salt                | g           | 1                 |
|                       |                            | Peanut Milk         | ml          | 30                |                       |                                           | Coriander           | g           | 2                 |
|                       |                            | Tap Water           | ml          | 120               | 24                    | Rice and Black-Eyed Beans with Soya Mince | Rice                | g           | 30                |
|                       |                            | Sugar               | g           | 20                |                       |                                           | Black-Eyed Beans    | g           | 20                |
| 12                    | Banana and Apple Smoothie  | Banana              | g           | 50                |                       |                                           | Carrot              | g           | 20                |
|                       |                            | Apple               | g           | 50                |                       |                                           | Soya Protein Mince  | g           | 10                |
|                       |                            | Peanut Milk         | ml          | 30                |                       |                                           | Pumpkin             | g           | 25                |
|                       |                            | Tap Water           | ml          | 120               |                       |                                           | Onion               | g           | 8                 |
|                       |                            | Sugar               | g           | 20                |                       |                                           | Tomato              | g           | 10                |
| 13                    | Banana and Papaya Smoothie | Papaya              | g           | 50                |                       |                                           | Garlic              | g           | 1                 |
|                       |                            | Banana              | g           | 50                |                       |                                           | Soybean Oil         | ml          | 4                 |
|                       |                            | Peanut Milk         | ml          | 30                |                       |                                           | Kale                | g           | 5                 |
|                       |                            | Tap Water           | ml          | 120               |                       |                                           | Coriander           | g           | 2                 |
|                       |                            | Sugar               | g           | 20                |                       |                                           | Salt                | g           | 1                 |
| 14                    | Sweetcorn Coconut Pudding  | Coconut Milk        | ml          | 3                 | 25                    | Black Beans and Vegetables cassarole      | Tap Water           | ml          | 120               |
|                       |                            | Peanut Milk         | ml          | 30                |                       |                                           | Black Beans         | g           | 15                |
|                       |                            | Tap Water           | ml          | 120               |                       |                                           | Onion               | g           | 8                 |
|                       |                            | Hominy              | g           | 20                |                       |                                           | Garlic              | g           | 1                 |
|                       |                            | Sugar               | g           | 15                |                       |                                           | Soybean Oil         | ml          | 4                 |
| 15                    | Cornmeal Porridge          | Peanut Milk         | ml          | 30                |                       |                                           | Tomato              | g           | 10                |
|                       |                            | Tap Water           | ml          | 120               |                       |                                           | Soya Protein Mince  | g           | 12                |
|                       |                            | Fine Cornmeal       | g           | 20                |                       |                                           | Carrot              | g           | 20                |
|                       |                            | Sugar               | g           | 15                |                       |                                           | Potato              | g           | 25                |
| 16                    | Sweet Rice Pudding         | Rice                | g           | 30                |                       |                                           | Sweet Potato        | g           | 50                |
|                       |                            | Tap Water           | ml          | 60                |                       |                                           | Fresh Coconut       | g           | 20                |
|                       |                            | Sugar               | g           | 15                |                       |                                           | Beetroot            | g           | 15                |
|                       |                            | Coconut Milk        | ml          | 3                 |                       |                                           | Coriander           | g           | 2                 |
|                       |                            | Peanut Milk         | ml          | 30                |                       |                                           | Salt                | g           | 1                 |
|                       |                            | Cinnamon Sticks     | g           | 1                 |                       |                                           | Bay leaves          | g           | 1                 |
|                       |                            | Lemon Zests         | g           | 1                 |                       |                                           | Tap Water           | ml          | 70                |
| 17                    | Hotdog Bread               | Hotdog bread        | g           | 50                | 26                    | Beans and vegetables soup                 | Pinto Beans         | g           | 20                |
| 18                    | Soya Mince Sandwich        | Soya Protein Mince  | g           | 40                |                       |                                           | Carrot              | g           | 20                |
|                       |                            | Canned Tomato Sauce | g           | 95                |                       |                                           | Pumpkin             | g           | 25                |
|                       |                            | Tap Water           | ml          | 240               |                       |                                           | Potato              | g           | 25                |
|                       |                            | Garlic              | g           | 1                 |                       |                                           | Onion               | g           | 8                 |
|                       |                            | Onion               | g           | 8                 |                       |                                           | Garlic              | g           | 1                 |
|                       |                            | Carrot              | g           | 20                |                       |                                           | Soybean Oil         | ml          | 4                 |
|                       |                            | Soybean Oil         | ml          | 6                 |                       |                                           | Coriander           | g           | 2                 |
|                       |                            | Coriander           | g           | 2                 |                       |                                           | Salt                | g           | 1                 |
|                       |                            | Tomato              | g           | 10                |                       |                                           | Chives              | g           | 1                 |
|                       |                            | Oregano             | g           | 0                 |                       |                                           | Tap Water           | ml          | 60                |
|                       |                            | Salt                | g           | 1                 | 27                    | Soya Mince Bolongnese Pasta               | Pasta               | g           | 30                |
|                       |                            | Bread               | g           | 50                |                       |                                           | Salt                | g           | 1                 |
| 19                    | Cream Cracker              | Cracker             | g           | 17                |                       |                                           | Soya Protein Mince  | g           | 40                |
| 20                    | Peanut Butter Candy        | Peanut              | g           | 30                |                       |                                           | Canned Tomato Sauce | g           | 10                |
|                       |                            | Sugar               | g           | 10                |                       |                                           | Garlic              | g           | 1                 |
|                       |                            | Tap Water           | ml          | 1                 |                       |                                           | Onion               | g           | 8                 |
|                       |                            | Salt                | g           | 1                 |                       |                                           | Carrot              | g           | 20                |
|                       |                            | Soybean Oil         | ml          | 2                 |                       |                                           | Tap Water           | ml          | 380               |
| 21                    | Rice                       | Onion               | g           | 8                 |                       |                                           | Soybean Oil         | ml          | 4                 |
|                       |                            | Garlic              | g           | 1                 |                       |                                           | Tomato              | g           | 10                |
|                       |                            | Soybean Oil         | ml          | 4                 |                       |                                           |                     |             |                   |
|                       |                            | Salt                | g           | 1                 |                       |                                           |                     |             |                   |
|                       |                            | Tap Water           | ml          | 200               |                       |                                           |                     |             |                   |
|                       |                            | Parboiled rice      | g           | 30                |                       |                                           |                     |             |                   |



| Sustainable Food Menu |                                        |                     |             |                   |
|-----------------------|----------------------------------------|---------------------|-------------|-------------------|
| Recipe number         | Food recipe                            | Ingredients         | Unit (g/ml) | Per capita (g/ml) |
| 28                    | Okra and Pumpkin Soya Chunks cassarole | Pumpkin             | g           | 25                |
|                       |                                        | Okra                | g           | 20                |
|                       |                                        | Salt                | g           | 1                 |
|                       |                                        | Soybean Oil         | ml          | 4                 |
|                       |                                        | Onion               | g           | 8                 |
|                       |                                        | Tap Water           | ml          | 80                |
|                       |                                        | Garlic              | g           | 1                 |
| 29                    | Plant-based Shepherd's Pie             | Soya Protein Chunks | g           | 10                |
|                       |                                        | Potato              | g           | 25                |
|                       |                                        | Onion               | g           | 8                 |
|                       |                                        | Garlic              | g           | 1                 |
|                       |                                        | Canned Tomato Sauce | g           | 11                |
|                       |                                        | Tomato              | g           | 10                |
|                       |                                        | Tap Water           | ml          | 80                |
|                       |                                        | Salt                | g           | 1                 |
|                       |                                        | Soybean Oil         | ml          | 4                 |
|                       |                                        | Soya Protein Chunks | g           | 8                 |
| 30                    | Vegetables and Soya Chunks Cassarole   | Canned Tomato Sauce | g           | 5                 |
|                       |                                        | Onion               | g           | 8                 |
|                       |                                        | Chives              | g           | 1                 |
|                       |                                        | Parsley             | g           | 1                 |
|                       |                                        | Potato              | g           | 20                |
|                       |                                        | Carrot              | g           | 15                |
|                       |                                        | Pasta               | g           | 20                |
| 31                    | Vegetable Soup with Soya Mince         | Salt                | g           | 1                 |
|                       |                                        | Pumpkin             | g           | 25                |
|                       |                                        | Garlic              | g           | 1                 |
|                       |                                        | Onion               | g           | 8                 |
|                       |                                        | Carrot              | g           | 20                |
|                       |                                        | Potato              | g           | 25                |
|                       |                                        | Coriander           | g           | 2                 |
|                       |                                        | Tomato              | g           | 10                |
|                       |                                        | Tap Water           | ml          | 340               |
|                       |                                        | Soybean Oil         | ml          | 4                 |
| 32                    | Vegetable Couscous                     | Soya Protein Chunks | g           | 10                |
|                       |                                        | Flaked corn flour   | g           | 40                |
|                       |                                        | Carrot              | g           | 12                |
|                       |                                        | Soya Protein Mince  | g           | 10                |
|                       |                                        | Tomato              | g           | 30                |
|                       |                                        | Bell peper          | g           | 5                 |
|                       |                                        | Onion               | g           | 12                |
|                       |                                        | Garlic              | g           | 2                 |
|                       |                                        | Canned Tomato Sauce | g           | 11                |
|                       |                                        | Soybean Oil         | ml          | 6                 |
| 33                    | Cassava                                | Salt                | g           | 1                 |
|                       |                                        | Coriander           | g           | 6                 |
| 34                    | Potato with Carrot                     | Tap Water           | ml          | 40                |
|                       |                                        | Cassava             | g           | 60                |
| 35                    | Lettuce salad                          | Potato              | g           | 25                |
|                       |                                        | Carrot              | g           | 10                |
| 36                    | Lettuce and Tomato Salad               | Lettuce             | g           | 5                 |
|                       |                                        | Tomato              | g           | 10                |
| 37                    | Cassava Flour                          | Cassava Flour       | g           | 15                |
| 38                    | Coconut Cake                           | Wheat Flour         | g           | 2                 |
|                       |                                        | Sugar               | g           | 1                 |
|                       |                                        | Grated Cocunut      | g           | 0                 |
|                       |                                        | Soybean Oil         | ml          | 1                 |
|                       |                                        | Coconut Milk        | ml          | 1                 |
|                       |                                        | Tap Water           | ml          | 1                 |
|                       |                                        | Baking Powder       | g           | 1                 |
